# Supplementary material for: Modeling the Longitudinal Effects of Insight on Depression, Quality of Life and Suicidality in Schizophrenia Spectrum Disorders: Results from the FACE-SZ Cohort
Source: PubMed Central journal article supplement (PMC6723809; doi:10.3390/jcm8081196), 2019-08-10
Supplement: jcm-08-01196-s001.pdf [file jcm-08-01196-s001.pdf]

## Supplementary material

1. Figure S1. Model adapted from Roux *et al.* (2018)
2. Supplementary methods
3. Table S1. Characteristics of diagnostic subgroups.
4. Table S2. Comparison between completers and non-completers.
5. Table S3. Model comparisons.
6. Table S4. Unstandardized and standardized coupling and autoregressive path coefficients and statistics in the final multivariate model.
7. Table S5. Zero-order correlation matrix between the variables of interest

**Figure S1**

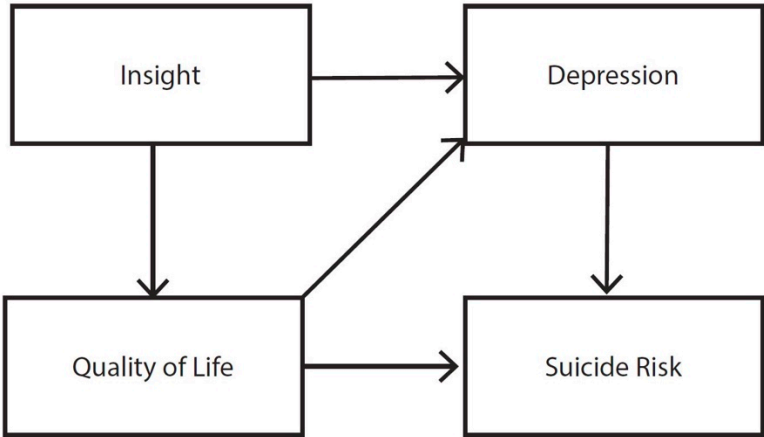

**Figure 1.** Model adapted from Roux *et al.* (2018)

## **Supplementary methods**

### **Required sample size estimation**

Velicer & Fava[1] showed that minimum sample size should not be a function of the number of indicators when the model involves latent variables, as these rules of thumb are not supported by evidence and lead to inaccurate estimates. They emphasized the importance of the number of indicators per latent variable. Marsh & Bailey[2] and Boomsma[3] suggested that the ratio of indicator per latent variable is a better basis to calculate adequate sample size. Increasing the number of indicators per latent variable maximizes the amount of information available for estimating parameters, as well as the collection of more data. Based on the previous works of Marsh[4–6], Westland[7] suggested the following formula to calculate sample size:  $n \geq 50r^2 - 450r + 1100$  (where  $r$  is the ratio of indicators per latent variable). We followed relatively conservative recommendations[8] and included 15 observations per variable for additional observed variables and covariates which were not included in a latent variable.

Our most complete model included eight latent variables manifested by 26 indicators; thus  $r = 3.25$ . According to the formula cited above, our sample should have been greater than 166 subjects. In addition to the latent variable, there were two observed variables not included in a latent variable and four covariates (positive, negative, general symptomatology, chlorpromazine equivalent dose) measured twice, thus necessitating 120 additional subjects. The total recommended sample size for our most complete model was 286 participants.

### **Longitudinal invariance of the latent variables**

The latent variables were tested for longitudinal invariance with confirmatory factor analyses[9,10] by successively constraining parameters to be equal across times of measurement (configural invariance: constrained factorial structure; metric invariance: constrained factorial structure and factor loadings; scalar invariance: constrained factorial structure, factor loadings, and intercepts). Latent variables should reach scalar invariance to be considered equally reliable across time and be integrated in a longitudinal model.

The latent variable insight achieved scalar invariance with good fit indices: CFI = 1 and TLI = 1, RMSEA < 0.05 ( $p = 0.81$ ), and SRMR = 0.02. The latent variable QoL achieved scalar invariance with good fit indices: CFI =

0.988 and TLI = 0.988, RMSEA < 0.05 ( $p = 0.98$ ), and SRMR = 0.04. All factor loadings were significant ( $p < 0.001$ ). Hence, the latent variables met the requirements to be integrated into the models.

## References

1. Velicer, W.F.; Fava, J.L. Effects of variable and subject sampling on factor pattern recovery. *Psychol. Methods* **1998**, *3*, 231–251.
2. Marsh, H.W.; Bailey, M. Confirmatory Factor Analyses of Multitrait-Multimethod Data: A Comparison of Alternative Models. *Appl. Psychol. Meas.* **1991**, *15*, 47–70.
3. Boomsma, A. The robustness of LISREL against small sample sizes in factor analysis models. *Syst. Indirect Obs. Causality Struct. Predict.* **1982**, 149–173.
4. Marsh, H.W.; Balla, J.R.; McDonald, R.P. Goodness-of-fit indexes in confirmatory factor analysis: The effect of sample size. *Psychol. Bull.* **1988**, *103*, 391–410.
5. Marsh, H.W.; Hau, K.-T.; Balla, J.R.; Grayson, D. Is More Ever Too Much? The Number of Indicators per Factor in Confirmatory Factor Analysis. *Multivar. Behav. Res.* **1998**, *33*, 181–220.
6. Marsh, H.W.; Balla, J.R.; Hau, K.T. An Evaluation of Incremental Fit Indexes: A Clarification of Mathematical and Empirical Properties. In *Advanced Structural Equation Modeling Techniques : Issues and Techniques*; G.A. Marcoulides and R.E. Schumaker (eds): Mahwah, N.J, 1996; pp. 315–353.
7. Westland, C.J. Lower bounds on sample size in structural equation modeling. **2010**.
8. Stevens, J. *Applied multivariate statistics for the social sciences*; L. Erlbaum Associates: Mahwah (New Jersey), 1996; ISBN 978-0-8058-3471-0.
9. Meredith, W. Measurement invariance, factor analysis and factorial invariance. *Psychometrika* **1993**, *58*, 525–543.
10. Brown, T.A. *Confirmatory factor analysis for applied research*; Methodology in the social sciences; Second edition.; The Guilford Press: New York ; London, 2015; ISBN 978-1-4625-1779-4.

**Table S1a. Characteristics of diagnosis subgroups at inclusion**

|                                                   | Schizophrenia<br>(n = 269) |       | Schizo-affective<br>disorder (n = 72) |       |
|---------------------------------------------------|----------------------------|-------|---------------------------------------|-------|
|                                                   | Mean                       | SD    | Mean                                  | SD    |
| <b>Age (years)</b>                                | 32.3                       | 9.5   | 32.8                                  | 9.1   |
| <b>Age at onset (years)</b>                       | 21.8                       | 6.4   | 20.8                                  | 6.4   |
| <b>Total duration of hospitalization (months)</b> | 7.2                        | 9.9   | 9.5                                   | 10.4  |
| <i>BIS (0-12)</i>                                 | 8.8                        | 2.9   | 9.2                                   | 2.5   |
| <i>SUMD (0-100)</i>                               | 31.2                       | 32.3  | 27.9                                  | 31.7  |
| <i>PANSS G12 (1-7)</i>                            | 3.2                        | 1.5   | 2.8                                   | 1.5   |
| <i>QOL - Self-Esteem (0-100)</i>                  | 47.3                       | 30    | 45.4                                  | 31.4  |
| <i>QOL - Resilience (0-100)</i>                   | 56.4                       | 24.9  | 50.9                                  | 29.3  |
| <i>QOL - Autonomy (0-100)</i>                     | 58.3                       | 28.4  | 50.2                                  | 25.9  |
| <i>QOL - Physical well-being (0-100)</i>          | 45.6                       | 27.3  | 43.8                                  | 29.8  |
| <i>QOL - Psychological well-being (0-100)</i>     | 51.5                       | 27.3  | 51.3                                  | 28    |
| <i>QOL - Family relationships (0-100)</i>         | 68.5                       | 26.1  | 70.8                                  | 23.6  |
| <i>QOL - Friends relationships (0-100)</i>        | 47.2                       | 29    | 46.7                                  | 27.5  |
| <i>QOL - Sentimental life (0-100)</i>             | 33.6                       | 27.9  | 34.3                                  | 31.5  |
| <b>CDS without suicide item (0-24)</b>            | 3.7                        | 3.7   | 4.8                                   | 4.9   |
| <b>Calgary suicide item</b>                       | 0.3                        | 0.6   | 0.3                                   | 0.6   |
| <b>Risk of suicide (0-5)</b>                      | 1.3                        | 1.7   | 2                                     | 1.8   |
| <b>PANSS Positive (7-49)</b>                      | 15.1                       | 5.4   | 13.8                                  | 4.9   |
| <b>Negative (7-49)</b>                            | 21.4                       | 7.1   | 19.5                                  | 7.1   |
| <b>General without G12 (16-105)</b>               | 32.9                       | 9.3   | 31.1                                  | 9.2   |
| <b>Chlorpromazine equivalent doses</b>            | 510                        | 591.8 | 539.5                                 | 604.5 |
|                                                   | N                          | %     |                                       |       |
| <b>Sex, male</b>                                  | 211                        | 78.4  | 52                                    | 72.2  |
| <b>Hospitalized the current year</b>              | 91                         | 33.8  | 40                                    | 55.6  |
| <b>Suicide attempt over the past year, yes</b>    | 17                         | 6.3   | 8                                     | 11.1  |

**Table S2. Comparison between completers and non-completers.**

| <b>Variable</b>                                 | <b>Completers<br/>(n = 370)</b> | <b>Non-completers<br/>(n = 368)</b> | <b>p</b> | <b>d</b> | <b>Statistics</b> |
|-------------------------------------------------|---------------------------------|-------------------------------------|----------|----------|-------------------|
| <b>Sex (% male)</b>                             | 70.9                            | 76.8                                | 0.086    | 0.063    | X2 (1) = 2.96     |
| <b>Age (years)</b>                              | 32.14 (10.11)                   | 32.33 (9.41)                        | 0.79     | 0.02     | t(731.7) = -0.27  |
| <b>Diagnosis (SZ/SZ-A/SZ-F)</b>                 | 76.6 / 20.9 / 2.4               | 77.6 / 21.6 / 0.8                   | 0.213    | 0.065    | X2 (2) = 3.1      |
| <b>Age at onset (years)</b>                     | 21.41 (6.61)                    | 21.58 (6.36)                        | 0.733    | 0.026    | t(684.7) = -0.34  |
| <b>BIS (0-12)</b>                               | 8.45 (3.07)                     | 8.89 (2.8)                          | 0.052    | 0.151    | t(650.7) = -1.95  |
| <b>SUMD (0-100)</b>                             | 34.53 (33.78)                   | 30.48 (31.71)                       | 0.108    | -0.123   | t(672.2) = 1.61   |
| <b>SQOL (0-100)</b>                             | 53.14 (19.03)                   | 51.33 (18.28)                       | 0.206    | -0.097   | t(679.4) = 1.27   |
| <b>Calgary (0-27)</b>                           | 3.92 (4.35)                     | 4.09 (4.35)                         | 0.605    | 0.039    | t(703.5) = -0.52  |
| <b>Risk of suicide (0-5)</b>                    | 1.43 (1.74)                     | 1.41 (1.77)                         | 0.889    | -0.011   | t(700.7) = 0.14   |
| <b>PANSS Positive (7-49)</b>                    | 15.15 (6.38)                    | 14.94 (5.27)                        | 0.638    | -0.035   | t(675) = 0.47     |
| <b>PANSS Negative (7-49)</b>                    | 20.97 (7.33)                    | 21.01 (7.19)                        | 0.93     | 0.007    | t(708.3) = -0.09  |
| <b>PANSS General (16-112)</b>                   | 36.58 (11.09)                   | 35.54 (9.73)                        | 0.182    | -0.1     | t(690.5) = 1.34   |
| <b>PANSS Total (31-217)</b>                     | 72.69 (21.07)                   | 71.49 (18.09)                       | 0.414    | -0.061   | t(685.6) = 0.82   |
| <b>Chlorpromazine<br/>equivalent doses (mg)</b> | 433.38 (543.95)                 | 520.16 (596.79)                     | 0.055    | 0.152    | t(614.6) = -1.92  |

SZ: schizophrenia, SZ-A: schizo-affective disorder, SZ-F: schizophreniform disorder.

**Table S3. Model comparisons. For each category, the retained model is shown in bold.** Values for the AIC, BIC, Chi-square (Chisq) and Chi-square difference are rounded to the nearest decimal.

**Insight and quality of life**

| Df  | AIC     | BIC     | Chisq | Chisq diff | Df diff | Pr(>Chisq) | Comparison     |
|-----|---------|---------|-------|------------|---------|------------|----------------|
| 385 | 23619.5 | 24042   | 633.3 | -          | -       | -          | Expected       |
| 386 | 23621.9 | 24040.5 | 637.6 | 4.3        | 1       | 0.037      | Autoregressive |
| 385 | 23622.3 | 24044.7 | 636   | -          | -       | -          | Reverse        |
| 386 | 23621.9 | 24040.5 | 637.6 | 1.6        | 1       | 0.203      | Autoregressive |
| 384 | 23620.1 | 24046.4 | 631.8 | -          | -       | -          | Reciprocal     |
| 386 | 23621.9 | 24040.5 | 637.6 | 5.8        | 2       | 0.055      | Autoregressive |
| 384 | 23620.1 | 24046.4 | 631.8 | -          | -       | -          | Reciprocal     |
| 385 | 23619.5 | 24042   | 633.3 | 1.5        | 1       | 0.224      | Expected       |
| 384 | 23620.1 | 24046.4 | 631.8 | -          | -       | -          | Reciprocal     |
| 385 | 23622.3 | 24044.7 | 636   | 4.2        | 1       | 0.04       | Reverse        |

| CFI          | TLI          | RMSEA        | RMSEA <0.05<br>p-value | SRMR         | ECVI        | Models          |
|--------------|--------------|--------------|------------------------|--------------|-------------|-----------------|
| 0.927        | 0.923        | 0.044        | 0.964                  | 0.059        | 2.487       | Autoregressive  |
| <b>0.928</b> | <b>0.923</b> | <b>0.043</b> | <b>0.968</b>           | <b>0.056</b> | <b>2.48</b> | <b>Expected</b> |
| 0.927        | 0.923        | 0.044        | 0.964                  | 0.058        | 2.488       | Reverse         |
| 0.928        | 0.923        | 0.043        | 0.968                  | 0.055        | 2.482       | Reciprocal      |

### Quality of life and depression

| Df  | AIC     | BIC     | Chisq | Chisq diff | Df diff | Pr(>Chisq) | Compared models |
|-----|---------|---------|-------|------------|---------|------------|-----------------|
| 278 | 20730.6 | 21110.8 | 422.7 | -          | -       | -          | Expected        |
| 279 | 20736.7 | 21113.1 | 430.9 | 7.9        | 1       | 0.005      | Autoregressive  |
| 278 | 20738.7 | 21118.9 | 430.8 | -          | -       | -          | Reverse         |
| 279 | 20736.7 | 21113.1 | 430.9 | 0.1        | 1       | 0.804      | Autoregressive  |
| 277 | 20732.4 | 21116.5 | 422.5 | -          | -       | -          | Reciprocal      |
| 279 | 20736.7 | 21113.1 | 430.9 | 7.3        | 2       | 0.026      | Autoregressive  |
| 277 | 20732.4 | 21116.5 | 422.5 | -          | -       | -          | Reciprocal      |
| 278 | 20730.6 | 21110.8 | 422.7 | 0.1        | 1       | 0.709      | Expected        |
| 277 | 20732.4 | 21116.5 | 422.5 | -          | -       | -          | Reciprocal      |
| 278 | 20738.7 | 21118.9 | 430.8 | 7          | 1       | 0.008      | Reverse         |

| CFI          | TLI          | RMSEA        | RMSEA <0.05<br>p-value | SRMR        | ECVI         | Models          |
|--------------|--------------|--------------|------------------------|-------------|--------------|-----------------|
| 0.948        | 0.944        | 0.036        | 0.999                  | 0.054       | 1.822        | Autoregressive  |
| <b>0.951</b> | <b>0.947</b> | <b>0.035</b> | <b>1</b>               | <b>0.05</b> | <b>1.804</b> | <b>Expected</b> |
| 0.947        | 0.944        | 0.037        | 0.999                  | 0.054       | 1.828        | Reverse         |
| 0.95         | 0.946        | 0.036        | 1                      | 0.05        | 1.81         | Reciprocal      |



**Depression and suicidality**

| Df | AIC    | BIC    | Chisq | Chisq diff | Df diff | Pr(>Chisq) | Comparison             |
|----|--------|--------|-------|------------|---------|------------|------------------------|
| 17 | 9067.7 | 9298.1 | 40.4  | -          | -       | -          | Expected               |
| 18 | 9084   | 9310.6 | 58.6  | 15.8       | 1       | 0          | Autoregressive         |
| 17 | 9078.9 | 9309.3 | 51.6  | -          | -       | -          | Reverse                |
| 18 | 9084   | 9310.6 | 58.6  | 5.6        | 1       | 0.018      | Autoregressive         |
| 16 | 9065   | 9299.2 | 35.6  | -          | -       | -          | Reciprocal             |
| 18 | 9084   | 9310.6 | 58.6  | 20         | 2       | 0          | Autoregressive         |
| 16 | 9065   | 9299.2 | 35.6  | -          | -       | -          | Reciprocal             |
| 17 | 9067.7 | 9298.1 | 40.4  | 4.1        | 1       | 0.042      | Expected               |
| 16 | 9065   | 9299.2 | 35.6  | -          | -       | -          | Reciprocal             |
| 17 | 9078.9 | 9309.3 | 51.6  | 15.3       | 1       | 0          | Reverse                |
| 16 | 9065   | 9299.2 | 35.6  | -          | -       | -          | Reciprocal             |
| 17 | 9065.5 | 9295.9 | 38.1  | 2.7        | 1       | 0.099      | Constrained reciprocal |

| CFI          | TLI          | RMSEA        | RMSEA <0.05<br>p-value | SRMR         | ECVI         | Models                 |
|--------------|--------------|--------------|------------------------|--------------|--------------|------------------------|
| 0.916        | 0.841        | 0.081        | 0.014                  | 0.042        | 0.513        | Autoregressive         |
| 0.951        | 0.903        | 0.064        | 0.168                  | 0.037        | 0.466        | Expected               |
| 0.928        | 0.856        | 0.078        | 0.028                  | 0.037        | 0.499        | Reverse                |
| <b>0.959</b> | <b>0.912</b> | <b>0.061</b> | <b>0.227</b>           | <b>0.034</b> | <b>0.458</b> | <b>Reciprocal</b>      |
| 0.956        | 0.911        | 0.061        | 0.211                  | 0.033        | 0.46         | Constrained reciprocal |

Insight and depression

| Df | AIC     | BIC     | Chisq | Chisq diff | Df diff | Pr(>Chisq) | Comparison     |
|----|---------|---------|-------|------------|---------|------------|----------------|
| 69 | 12463.5 | 12782.3 | 169.3 | -          | -       | -          | Expected       |
| 72 | 12468.6 | 12775.8 | 180.3 | 11.3       | 3       | 0.01       | Autoregressive |
| 69 | 12473.2 | 12792   | 179   | -          | -       | -          | Reverse        |
| 72 | 12468.6 | 12775.8 | 180.3 | 1.4        | 3       | 0.717      | Autoregressive |
| 68 | 12464.6 | 12787.2 | 168.4 | -          | -       | -          | Reciprocal     |
| 72 | 12468.6 | 12775.8 | 180.3 | 11.9       | 4       | 0.018      | Autoregressive |
| 68 | 12464.6 | 12787.2 | 168.4 | -          | -       | -          | Reciprocal     |
| 69 | 12463.5 | 12782.3 | 169.3 | 0.8        | 1       | 0.357      | Expected       |
| 68 | 12464.6 | 12787.2 | 168.4 | -          | -       | -          | Reciprocal     |
| 69 | 12473.2 | 12792   | 179   | 9.6        | 1       | 0.002      | Reverse        |

| CFI          | TLI         | RMSEA        | RMSEA <0.05<br>p-value | SRMR         | ECVI         | Models          |
|--------------|-------------|--------------|------------------------|--------------|--------------|-----------------|
| 0.927        | 0.907       | 0.067        | 0.013                  | 0.054        | 0.989        | Autoregressive  |
| <b>0.933</b> | <b>0.91</b> | <b>0.065</b> | <b>0.021</b>           | <b>0.047</b> | <b>0.975</b> | <b>Expected</b> |
| 0.926        | 0.901       | 0.068        | 0.007                  | 0.053        | 1.003        | Reverse         |
| 0.932        | 0.909       | 0.066        | 0.018                  | 0.046        | 0.978        | Reciprocal      |

Insight and suicidality

| Df | AIC     | BIC     | Chisq | Chisq diff | Df diff | Pr(>Chisq) | Comparison     |
|----|---------|---------|-------|------------|---------|------------|----------------|
| 67 | 12597.7 | 12924.2 | 127.7 | -          | -       | -          | Expected       |
| 68 | 12603.9 | 12926.6 | 136   | 11.1       | 1       | 0.001      | Autoregressive |
| 67 | 12603.8 | 12930.3 | 133.8 | -          | -       | -          | Reverse        |
| 68 | 12603.9 | 12926.6 | 136   | 2          | 1       | 0.157      | Autoregressive |
| 66 | 12597.7 | 12928   | 125.7 | -          | -       | -          | Reciprocal     |
| 68 | 12603.9 | 12926.6 | 136   | 11.4       | 2       | 0.003      | Autoregressive |
| 66 | 12597.7 | 12928   | 125.7 | -          | -       | -          | Reciprocal     |
| 67 | 12597.7 | 12924.2 | 127.7 | 1.9        | 1       | 0.169      | Expected       |
| 66 | 12597.7 | 12928   | 125.7 | -          | -       | -          | Reciprocal     |
| 67 | 12603.8 | 12930.3 | 133.8 | 11.1       | 1       | 0.001      | Reverse        |

| CFI         | TLI          | RMSEA        | RMSEA <0.05<br>p-value | SRMR         | ECVI         | Models          |
|-------------|--------------|--------------|------------------------|--------------|--------------|-----------------|
| 0.945       | 0.925        | 0.056        | 0.208                  | 0.052        | 0.884        | Autoregressive  |
| <b>0.95</b> | <b>0.932</b> | <b>0.054</b> | <b>0.319</b>           | <b>0.045</b> | <b>0.865</b> | <b>Expected</b> |
| 0.945       | 0.925        | 0.056        | 0.209                  | 0.05         | 0.883        | Reverse         |
| 0.951       | 0.932        | 0.054        | 0.319                  | 0.043        | 0.866        | Reciprocal      |

**Quality of life and suicidality**

| Df  | AIC     | BIC     | Chisq | Chisq diff | Df diff | Pr(>Chisq) | Comparison     |
|-----|---------|---------|-------|------------|---------|------------|----------------|
| 244 | 19534.1 | 19841.4 | 364.1 | -          | -       | -          | Expected       |
| 245 | 19536.3 | 19839.7 | 368.3 | 3.4        | 1       | 0.067      | Autoregressive |
| 244 | 19537.3 | 19844.6 | 367.3 | -          | -       | -          | Reverse        |
| 245 | 19536.3 | 19839.7 | 368.3 | 1.1        | 1       | 0.286      | Autoregressive |
| 243 | 19535.4 | 19846.4 | 363.3 | -          | -       | -          | Reciprocal     |
| 245 | 19536.3 | 19839.7 | 368.3 | 4.6        | 2       | 0.099      | Autoregressive |
| 243 | 19535.4 | 19846.4 | 363.3 | -          | -       | -          | Reciprocal     |
| 244 | 19534.1 | 19841.4 | 364.1 | 0.9        | 1       | 0.351      | Expected       |
| 243 | 19535.4 | 19846.4 | 363.3 | -          | -       | -          | Reciprocal     |
| 244 | 19537.3 | 19844.6 | 367.3 | 3.1        | 1       | 0.076      | Reverse        |

| CFI          | TLI          | RMSEA        | RMSEA <0.05<br>p-value | SRMR         | ECVI        | Models                |
|--------------|--------------|--------------|------------------------|--------------|-------------|-----------------------|
| <b>0.952</b> | <b>0.949</b> | <b>0.035</b> | <b>0.999</b>           | <b>0.049</b> | <b>1.53</b> | <b>Autoregressive</b> |
| 0.954        | 0.95         | 0.034        | 1                      | 0.047        | 1.524       | Expected              |
| 0.952        | 0.949        | 0.035        | 0.999                  | 0.049        | 1.533       | Reverse               |
| 0.954        | 0.95         | 0.035        | 1                      | 0.047        | 1.527       | Reciprocal            |

**Table S4.** Unstandardized (B) and standardized ( $\beta$ ) coupling and autoregressive path coefficients and statistics in the final multivariate model.

| Regression paths                               |                      | B ( $\beta$ ) | SE   | Z      | p                |
|------------------------------------------------|----------------------|---------------|------|--------|------------------|
| <b><math>\Delta</math>QoL</b>                  | ← QoL                | -0.42 (-0.50) | 0.06 | -7.1   | <b>&lt;0.001</b> |
|                                                | ← Insight            | -0.16 (-0.16) | 0.07 | -2.27  | <b>0.023</b>     |
| <b><math>\Delta</math>Depression</b>           | ← Depression         | -0.73 (-0.73) | 0.06 | -11.66 | <b>&lt;0.001</b> |
|                                                | ← Insight            | 0.18 (0.12)   | 0.08 | 2.14   | <b>0.033</b>     |
|                                                | ← QoL                | -0.18 (-0.14) | 0.08 | -2.13  | <b>0.033</b>     |
|                                                | ← Suicidality        | 0.05 (0.05)   | 0.05 | 1.08   | 0.28             |
| <b><math>\Delta</math>Suicidality</b>          | ← Suicidality        | -0.75 (-0.68) | 0.06 | -12.82 | <b>&lt;0.001</b> |
|                                                | ← Depression         | 0.22 (0.2)    | 0.05 | 4.06   | <b>&lt;0.001</b> |
|                                                | ← Insight            | 0.23 (0.14)   | 0.08 | 2.89   | <b>&lt;0.01</b>  |
| <b><math>\Delta</math>Insight</b>              | ← Insight            | -0.41 (-0.55) | 0.07 | -6.04  | <b>&lt;0.001</b> |
| <b>Covariances</b>                             |                      |               |      |        |                  |
| <b>Insight &lt;-&gt;</b>                       | QoL                  | -0.1 (-0.23)  | 0.03 | -3.58  | <b>&lt;0.001</b> |
|                                                | Depression           | 0.07 (0.14)   | 0.03 | 2.03   | <b>0.043</b>     |
|                                                | Suicidality          | 0.09 (0.17)   | 0.03 | 2.76   | <b>&lt;0.01</b>  |
| <b>QoL &lt;-&gt;</b>                           | Depression           | -0.27 (-0.46) | 0.04 | -6.18  | <b>&lt;0.001</b> |
|                                                | Suicidality          | -0.16 (-0.23) | 0.05 | -3.5   | <b>&lt;0.001</b> |
| <b>Depression &lt;-&gt;</b>                    | Suicidality          | 0.29 (0.36)   | 0.05 | 5.63   | <b>&lt;0.001</b> |
| <b><math>\Delta</math>Insight &lt;-&gt;</b>    | $\Delta$ QoL         | -0.02 (-0.09) | 0.02 | -1.01  | 0.31             |
|                                                | $\Delta$ Depression  | 0 (0)         | 0.02 | 0.03   | 0.97             |
|                                                | $\Delta$ Suicidality | 0.05 (0.13)   | 0.02 | 1.98   | <b>0.048</b>     |
| <b><math>\Delta</math>QoL &lt;-&gt;</b>        | $\Delta$ Depression  | -0.19 (-0.44) | 0.04 | -5.34  | <b>&lt;0.001</b> |
|                                                | $\Delta$ Suicidality | -0.13 (-0.26) | 0.04 | -3.52  | <b>&lt;0.001</b> |
| <b><math>\Delta</math>Depression &lt;-&gt;</b> | $\Delta$ Suicidality | 0.18 (0.28)   | 0.04 | 4.53   | <b>&lt;0.001</b> |

QoL: quality of life,  $\Delta$ X: change in variable X.

**Table S5. Zero-order correlation matrix between the variables of interest.**

|                | At inclusion |          |          |             |          |          |          |          |          |         |          |          |          |         |         |          |         |
|----------------|--------------|----------|----------|-------------|----------|----------|----------|----------|----------|---------|----------|----------|----------|---------|---------|----------|---------|
|                | BIS          | SUMD     | G12      | Suicidality | CDS      | QOL-SE   | QOL-Re   | QOL-Au   | QOL-PhW  | QOL-RFa | QOL-RFr  | QOL-SL   | QOL-PsW  | P-Pos   | P-Neg   | P-Gen    | Cpz eq  |
| BIS            | 1            |          |          |             |          |          |          |          |          |         |          |          |          |         |         |          |         |
| SUMD           | -0.63***     | 1        |          |             |          |          |          |          |          |         |          |          |          |         |         |          |         |
| PANSS-G12      | -0.55***     | 0.73***  | 1        |             |          |          |          |          |          |         |          |          |          |         |         |          |         |
| Suicidality    | 0.16**       | -0.17**  | -0.14**  | 1           |          |          |          |          |          |         |          |          |          |         |         |          |         |
| CDS            | 0.11*        | -0.05    | -0.1     | 0.42***     | 1        |          |          |          |          |         |          |          |          |         |         |          |         |
| QOL-SE         | -0.2***      | 0.18**   | 0.2***   | -0.32***    | -0.51*** | 1        |          |          |          |         |          |          |          |         |         |          |         |
| QOL-Re         | -0.02        | -0.03    | 0.05     | -0.1        | -0.38*** | 0.5***   | 1        |          |          |         |          |          |          |         |         |          |         |
| QOL-Au         | -0.15**      | 0.08     | 0.07     | -0.22***    | -0.33*** | 0.49***  | 0.39***  | 1        |          |         |          |          |          |         |         |          |         |
| QOL-PhW        | -0.2***      | 0.18**   | 0.2***   | -0.15**     | -0.38*** | 0.58***  | 0.43***  | 0.45***  | 1        |         |          |          |          |         |         |          |         |
| QOL-RFa        | 0.02         | -0.05    | 0        | 0.02        | -0.15**  | 0.14*    | 0.13*    | 0.25***  | 0.2***   | 1       |          |          |          |         |         |          |         |
| QOL-RFr        | -0.07        | -0.07    | -0.04    | -0.19***    | -0.34*** | 0.43***  | 0.32***  | 0.34***  | 0.38***  | 0.26*** | 1        |          |          |         |         |          |         |
| QOL-SL         | 0.04         | -0.08    | 0.01     | -0.08       | -0.25*** | 0.45***  | 0.32***  | 0.31***  | 0.36***  | 0.13*   | 0.38***  | 1        |          |         |         |          |         |
| QOL-PsW        | -0.09        | 0.12*    | 0.19***  | -0.17**     | -0.38*** | 0.53***  | 0.36***  | 0.37***  | 0.48***  | 0.13*   | 0.34***  | 0.36***  | 1        |         |         |          |         |
| PANSS-Pos      | -0.13*       | 0.16**   | 0.3***   | 0.06        | 0.13*    | -0.1     | 0.06     | -0.16**  | -0.02    | -0.14*  | -0.02    | -0.13*   | -0.02    | 1       |         |          |         |
| PANSS-Neg      | -0.16**      | 0.33***  | 0.37***  | -0.04       | 0.19***  | -0.05    | -0.16**  | -0.09    | -0.06    | -0.07   | -0.25*** | -0.08    | -0.11*   | 0.26*** | 1       |          |         |
| PANSS-Gen      | -0.04        | 0.1      | 0.17**   | 0.19***     | 0.52***  | -0.31*** | -0.23*** | -0.29*** | -0.3***  | -0.14*  | -0.29*** | -0.19*** | -0.3***  | 0.47*** | 0.55*** | 1        |         |
| Cpz eq         | 0.16**       | -0.06    | -0.09    | 0.12*       | 0.15*    | -0.08    | 0.02     | -0.04    | -0.08    | -0.01   | 0.03     | 0.03     | -0.03    | 0.12*   | 0.05    | 0.15*    | 1       |
| BIS_V1         | 0.65***      | -0.51*** | -0.47*** | 0.16**      | 0.02     | -0.16**  | -0.05    | -0.13*   | -0.16**  | 0       | -0.04    | 0.03     | -0.1     | -0.18** | -0.18** | -0.03    | 0.11    |
| SUMD_V1        | -0.41***     | 0.48***  | 0.41***  | -0.12*      | -0.08    | 0.13*    | 0.03     | 0.02     | 0.13*    | -0.01   | -0.01    | -0.06    | 0.07     | 0.15**  | 0.14*   | 0.02     | -0.08   |
| PANSS-G12_V1   | -0.42***     | 0.49***  | 0.5***   | -0.19***    | -0.05    | 0.15**   | 0.03     | 0.01     | 0.13*    | -0.05   | -0.09    | -0.05    | 0.1      | 0.26*** | 0.27*** | 0.13*    | -0.08   |
| Suicidality_V1 | 0.12*        | -0.18**  | -0.14*   | 0.39***     | 0.39***  | -0.27*** | -0.11    | -0.16**  | -0.23*** | -0.1    | -0.11    | -0.1     | -0.17**  | -0.01   | -0.07   | 0.12*    | 0.09    |
| CDS_V1         | 0.22***      | -0.11    | -0.1     | 0.27***     | 0.49***  | -0.4***  | -0.22*** | -0.24*** | -0.34*** | -0.09   | -0.23*** | -0.21*** | -0.32*** | 0.04    | 0.06    | 0.25***  | 0.07    |
| QOL-SE_V1      | -0.17**      | 0.11     | 0.13*    | -0.19***    | -0.36*** | 0.56***  | 0.29***  | 0.41***  | 0.44***  | 0.18**  | 0.3***   | 0.32***  | 0.38***  | -0.11*  | -0.04   | -0.25*** | -0.06   |
| QOL-Re_V1      | -0.15*       | 0.15**   | 0.1      | -0.13*      | -0.31*** | 0.4***   | 0.46***  | 0.38***  | 0.44***  | 0.14*   | 0.23***  | 0.25***  | 0.3***   | -0.01   | -0.12*  | -0.19*** | -0.02   |
| QOL-Au_V1      | -0.14*       | 0.02     | 0.04     | -0.16**     | -0.25*** | 0.34***  | 0.24***  | 0.51***  | 0.31***  | 0.17**  | 0.24***  | 0.26***  | 0.27***  | -0.16** | -0.12*  | -0.23*** | -0.05   |
| QOL-PhW_V1     | -0.13*       | 0.08     | 0.08     | -0.23***    | -0.3***  | 0.4***   | 0.3***   | 0.37***  | 0.52***  | 0.15**  | 0.28***  | 0.27***  | 0.31***  | -0.05   | 0       | -0.21*** | -0.09   |
| QOL-RFa_V1     | -0.1         | 0.04     | 0.03     | 0.02        | -0.09    | 0.06     | 0.05     | 0.19***  | 0.18**   | 0.55*** | 0.09     | 0.09     | 0.11     | -0.11   | -0.02   | -0.05    | -0.02   |
| QOL-RFr_V1     | -0.14*       | 0.12*    | 0.09     | -0.14*      | -0.21*** | 0.24***  | 0.23***  | 0.28***  | 0.22***  | 0.13*   | 0.47***  | 0.19**   | 0.28***  | -0.07   | -0.15** | -0.22*** | -0.02   |
| QOL-SL_V1      | -0.04        | 0.08     | 0.03     | -0.09       | -0.15**  | 0.26***  | 0.17**   | 0.24***  | 0.3***   | 0.07    | 0.19***  | 0.44***  | 0.22***  | -0.09   | -0.12*  | -0.15**  | -0.08   |
| QOL-PsW_V1     | -0.09        | 0.13*    | 0.08     | -0.15**     | -0.32*** | 0.39***  | 0.28***  | 0.26***  | 0.34***  | 0.21*** | 0.34***  | 0.23***  | 0.44***  | -0.1    | -0.18** | -0.3***  | -0.09   |
| PANSS-Pos_V1   | -0.07        | 0.06     | 0.19***  | 0.03        | 0.12*    | -0.09    | 0.07     | -0.12*   | -0.04    | -0.1    | -0.07    | -0.13*   | -0.05    | 0.54*** | 0.14**  | 0.33***  | 0.06    |
| PANSS-Neg_V1   | -0.19***     | 0.23***  | 0.29***  | -0.1        | 0.14*    | -0.05    | -0.04    | -0.09    | -0.03    | -0.06   | -0.17**  | -0.1     | -0.18*** | 0.19*** | 0.59*** | 0.36***  | 0       |
| PANSS-Gen_V1   | -0.05        | 0.04     | 0.16**   | 0.08        | 0.29***  | -0.21*** | -0.07    | -0.2***  | -0.2***  | -0.08   | -0.21*** | -0.15**  | -0.25*** | 0.28*** | 0.37*** | 0.54***  | 0.05    |
| Cpz eq_V1      | 0.11         | -0.01    | -0.04    | 0.11        | 0.11     | -0.05    | 0.01     | -0.09    | -0.08    | -0.12*  | 0.04     | -0.04    | -0.02    | 0.23*** | 0.15*   | 0.24***  | 0.72*** |

|                | At inclusion    |                |                |                 |                 |                 |                 |                 |                 |                |                 |                 |                 |                |                |              |        |
|----------------|-----------------|----------------|----------------|-----------------|-----------------|-----------------|-----------------|-----------------|-----------------|----------------|-----------------|-----------------|-----------------|----------------|----------------|--------------|--------|
|                | BIS             | SUMD           | G12            | Suicidality     | CDS             | QOL-SE          | QOL-Re          | QOL-Au          | QOL-PhW         | QOL-RFa        | QOL-RFr         | QOL-SL          | QOL-PsW         | P-Pos          | P-Neg          | P-Gen        | Cpz eq |
|                | At follow-up    |                |                |                 |                 |                 |                 |                 |                 |                |                 |                 |                 |                |                |              |        |
|                | BIS             | SUMD           | G12            | Suicidality     | CDS             | QOL-SE          | QOL-Re          | QOL-Au          | QOL-PhW         | QOL-RFa        | QOL-RFr         | QOL-SL          | QOL-PsW         | P-Pos          | P-Neg          | P-Gen        | Cpz eq |
| BIS_V1         | 1               |                |                |                 |                 |                 |                 |                 |                 |                |                 |                 |                 |                |                |              |        |
| SUMD_V1        | <b>-0.58***</b> | 1              |                |                 |                 |                 |                 |                 |                 |                |                 |                 |                 |                |                |              |        |
| PANSS-G12_V1   | <b>-0.53***</b> | <b>0.72***</b> | 1              |                 |                 |                 |                 |                 |                 |                |                 |                 |                 |                |                |              |        |
| Suicidality_V1 | <b>0.14*</b>    | <b>-0.17**</b> | <b>-0.16**</b> | 1               |                 |                 |                 |                 |                 |                |                 |                 |                 |                |                |              |        |
| CDS_V1         | 0.09            | -0.06          | -0.06          | <b>0.47***</b>  | 1               |                 |                 |                 |                 |                |                 |                 |                 |                |                |              |        |
| QOL-SE_V1      | -0.11           | 0.1            | 0.07           | <b>-0.38***</b> | <b>-0.59***</b> | 1               |                 |                 |                 |                |                 |                 |                 |                |                |              |        |
| QOL-Re_V1      | <b>-0.14*</b>   | <b>0.14*</b>   | 0.05           | <b>-0.25***</b> | <b>-0.38***</b> | <b>0.57***</b>  | 1               |                 |                 |                |                 |                 |                 |                |                |              |        |
| QOL-Au_V1      | -0.08           | 0.05           | 0              | <b>-0.19***</b> | <b>-0.36***</b> | <b>0.57***</b>  | <b>0.52***</b>  | 1               |                 |                |                 |                 |                 |                |                |              |        |
| QOL-PhW_V1     | <b>-0.11*</b>   | 0.08           | 0.11           | <b>-0.28***</b> | <b>-0.46***</b> | <b>0.61***</b>  | <b>0.55***</b>  | <b>0.52***</b>  | 1               |                |                 |                 |                 |                |                |              |        |
| QOL-RFa_V1     | 0.03            | 0.01           | -0.02          | <b>-0.2***</b>  | <b>-0.21***</b> | <b>0.22***</b>  | <b>0.16**</b>   | <b>0.25***</b>  | <b>0.24***</b>  | 1              |                 |                 |                 |                |                |              |        |
| QOL-RFr_V1     | -0.07           | 0.09           | -0.02          | <b>-0.15*</b>   | <b>-0.27***</b> | <b>0.42***</b>  | <b>0.37***</b>  | <b>0.42***</b>  | <b>0.36***</b>  | <b>0.23***</b> | 1               |                 |                 |                |                |              |        |
| QOL-SL_V1      | -0.06           | -0.04          | -0.05          | <b>-0.25***</b> | <b>-0.38***</b> | <b>0.42***</b>  | <b>0.36***</b>  | <b>0.35***</b>  | <b>0.39***</b>  | <b>0.17**</b>  | <b>0.41***</b>  | 1               |                 |                |                |              |        |
| QOL-PsW_V1     | <b>-0.13*</b>   | <b>0.15*</b>   | 0.09           | <b>-0.3***</b>  | <b>-0.49***</b> | <b>0.54***</b>  | <b>0.4***</b>   | <b>0.39***</b>  | <b>0.5***</b>   | <b>0.22***</b> | <b>0.42***</b>  | <b>0.37***</b>  | 1               |                |                |              |        |
| PANSS-Pos_V1   | <b>-0.19***</b> | <b>0.32***</b> | <b>0.39***</b> | 0.07            | <b>0.12*</b>    | -0.08           | 0               | -0.1            | -0.01           | <b>-0.15*</b>  | <b>-0.13*</b>   | <b>-0.18**</b>  | <b>-0.14*</b>   | 1              |                |              |        |
| PANSS-Neg_V1   | <b>-0.19**</b>  | <b>0.3***</b>  | <b>0.44***</b> | 0.04            | <b>0.22***</b>  | <b>-0.13*</b>   | <b>-0.21***</b> | <b>-0.24***</b> | -0.03           | -0.06          | <b>-0.23***</b> | <b>-0.28***</b> | <b>-0.28***</b> | <b>0.35***</b> | 1              |              |        |
| PANSS-Gen_V1   | -0.07           | 0.11           | <b>0.29***</b> | <b>0.24***</b>  | <b>0.49***</b>  | <b>-0.35***</b> | <b>-0.22***</b> | <b>-0.29***</b> | <b>-0.23***</b> | -0.07          | <b>-0.29***</b> | <b>-0.33***</b> | <b>-0.41***</b> | <b>0.52***</b> | <b>0.62***</b> | 1            |        |
| Cpz eq_V1      | 0.08            | -0.11          | -0.05          | 0.02            | 0.01            | -0.08           | -0.04           | -0.03           | -0.06           | -0.03          | -0.01           | -0.06           | -0.06           | <b>0.21***</b> | 0.04           | <b>0.14*</b> | 1      |

BIS: Birchwood Insight Scale; SUMD: Scale to assess Unawareness of Mental Disorder; G12: PANSS item G12; CDS: Calgary Depression Scale; QOL-xx: SQOL score of SE: self-esteem, Re: resilience, Au: autonomy, PhW: physical well-being, RFa: family relationships, RFr: relations with friends, SL: sentimental life, PsW: psychological well-being; P-Pos: PANSS positive symptoms; P-Neg: PANSS negative symptoms; P-Gen: PANSS general symptomatology (without item G12); CPZ eq: chlorpromazine equivalent dose
